# Supplementary material for: Data-driving methods: More than merely trendy buzzwords?
Source: Springer Nature journal article supplement (doi:10.1186/s13613-018-0405-7), 2018-05-01

## Hypothesis-driven

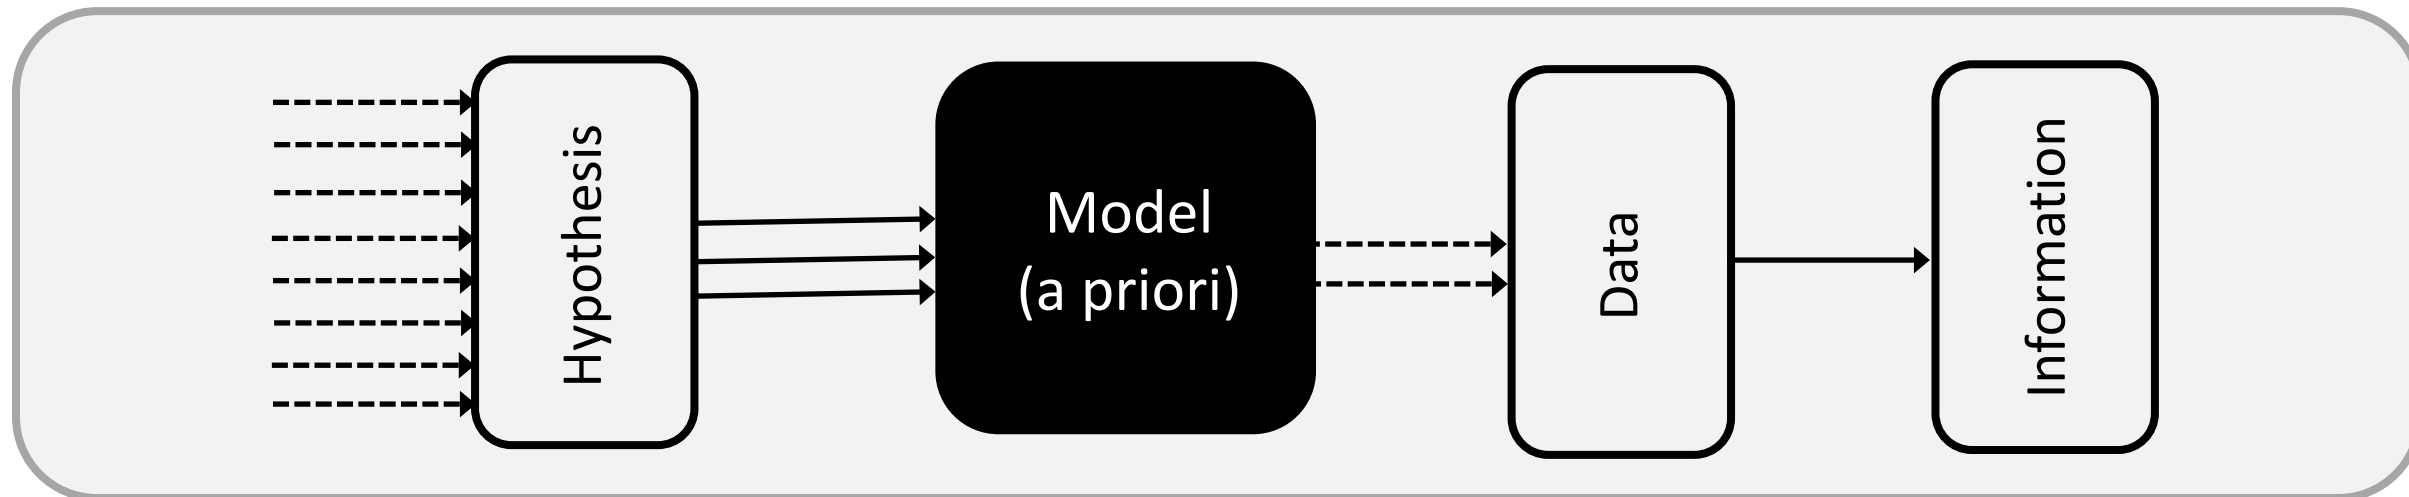

## Data-driven

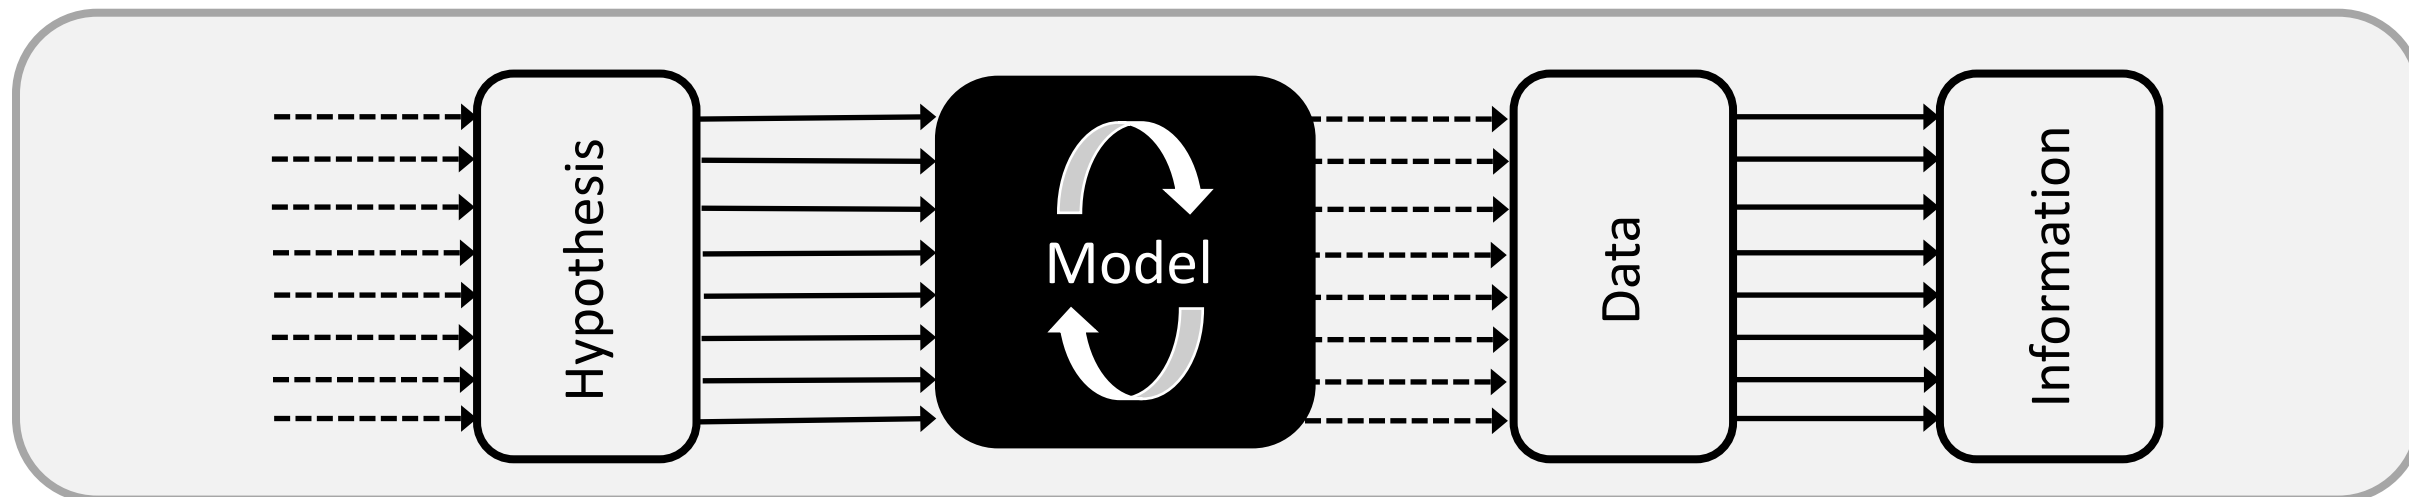

Supplement: MOESM1 [file 15733506]
